# Supplementary material
Source: publisher figshare collection journal article supplement (https://acs.figshare.com/ndownloader/files/11775272)
Supplement: Supplementary file 1 [file 11775272]

Archive with 3 entries (3 files):
- info.xml
- sb7b00423_high_quality.mp4
- sb7b00423.pdf
