# Supplementary material
Source: publisher figshare collection journal article supplement (https://acs.figshare.com/ndownloader/files/11775272)
Supplement: Supplementary file 1 [file 11775272 › info.xml]

<presentation>
	<article>
		<title>Cameo: A Python Library for Computer Aided Metabolic Engineering and Optimization of Cell Factories</title>
		<doi>10.1021/acssynbio.7b00423</doi>
		<copyright>American Chemical Society</copyright>
		<narrator>João Cardoso</narrator>
		<contact>Joao Cardoso, Nikolaus Sonnenschein</contact>
		<contact-email>joaca@biosustain.dtu.dk, niso@biosustain.dtu.dk</contact-email>
		<author-list>
			<author>Nikolaus Sonnenschein</author>
		</author-list>
	</article>
	<slides height-width-ratio=".75">
		<slide audio-time="12">
			<subtitle/>
		</slide>
		<slide audio-time="33">
			<subtitle/>
		</slide>
		<slide audio-time="63">
			<subtitle/>
		</slide>
		<slide audio-time="23">
			<subtitle/>
		</slide>
		<slide audio-time="15">
			<subtitle/>
		</slide>
		<slide audio-time="15">
			<subtitle/>
		</slide>
		<slide audio-time="12">
			<subtitle/>
		</slide>
		<slide audio-time="34">
			<subtitle/>
		</slide>
	</slides>
	<audio duration="207"/>
</presentation>
